1 Implementation of a practical and effective control program for *Taenia*  
2 *solium* in the Banke District of Nepal

3

4 Ishab Poudel<sup>1\*</sup>, Keshav Sah<sup>1</sup>, Suyog Subedi<sup>1</sup>; Dinesh Kumar Singh<sup>2</sup>, Peetambar Kushwaha<sup>3</sup>,  
5 Angela Colston<sup>4</sup>, Charles G. Gauci<sup>5</sup>, Meritxell Donadeu<sup>5</sup> & Marshall W. Lightowers<sup>5\*</sup>

6

7 **1** Heifer International, G.P.O. Box 6043, Kathmandu, Nepal, **2** Department of Pathology and Clinics (HOD),  
8 Tribhuvan University, Institute of Agriculture and Animal Science, Rampur Campus, Chitwan, Nepal, **3**  
9 GALVmed, Unit 118 & 120 B, Splendor Forum, Plot No 3, Jasola District Centre, Jasola, New Delhi, India –  
10 110025, **4** GALVmed, Galana Plaza, 4th Floor Wing C Suite B, Galana Road, Kilimani, Nairobi 00100 Kenya,  
11 **5** Veterinary Clinical Centre, Faculty of Veterinary and Agricultural Sciences, University of Melbourne, 250  
12 Princes Highway, Werribee Victoria 3030, Australia

13

14 \* Corresponding authors

15 Email: [Ishab.Poudel@heifer.org](mailto:Ishab.Poudel@heifer.org) (IP); [marshall@unimelb.edu.au](mailto:marshall@unimelb.edu.au) (MWL)

16

17 Short title: Implementation of a pilot control program for *Taenia solium* in Nepal

## 18 Abstract

19 *Taenia solium* is a zoonotic cestode parasite which causes human neurocysticercosis. Pigs  
20 transmit the parasite by acting as the intermediate host. An intervention was implemented in  
21 pigs to control transmission of *T. solium* in Dalit communities of Banke District, Nepal.  
22 Every 3 months, pigs were vaccinated with the TSOL18 recombinant vaccine (Cysvax™ ,  
23 IIL, India) and, at the same time, given an oral treatment with 30mg/kg oxfendazole  
24 (Paranthic 10%™, MCI, Morocco). The prevalence of porcine cysticercosis was determined  
25 in both an intervention area as well as a similar no intervention control area, among randomly  
26 selected, slaughter-age pigs. Post mortem assessments were undertaken both at the start and  
27 at the end of the intervention. Participants conducting the post mortem assessments were  
28 blinded as to the source of the animals being assessed. At the start of the intervention the  
29 prevalence of porcine cysticercosis was 23.6% and 34.5% in the control and intervention  
30 areas, respectively. Following the intervention, the prevalence of cysticercosis in pigs from  
31 the control area was 16.7% (no significant change), whereas no infection was detected after  
32 complete slicing of all muscle tissue and brain in animals from the intervention area  
33 (P=0.004). These findings are discussed in relation to the feasibility and sustainability of *T.*  
34 *solium* control. The 3-monthly vaccination and drug treatment intervention in pigs used here  
35 is suggested as an effective and practical method for reducing *T. solium* transmission, thereby  
36 reducing the incidence of human neurocysticercosis.

## 37 Author summary

38 Neurocysticercosis is a disease caused by a parasitic infection of the brain. The parasite  
39 responsible, *Taenia solium*, is transmitted by pigs where human sanitation is poor and pigs  
40 roam freely. Neurocysticercosis is responsible for many cases of epilepsy in people living in  
41 poor, developing countries. The feasibility and sustainability of implementing control  
42 measures have been major impediments to reducing the incidence of neurocysticercosis.  
43 Recently, two new commercial products have become available for pigs which together offer  
44 the possibility of interrupting the parasite's transmission – the TSOL18 vaccine (Cysvax™,  
45 IIL, India) and an oxfendazole formulation (Paranthic 10%™, MCI, Morocco) licensed for  
46 use in pigs for the treatment of cysticercosis. Here we describe the impact of implementing  
47 vaccination plus drug treatment of pigs in the Banke district of Nepal. The intervention  
48 eliminated the risk of transmission of *T. solium* by the animals vaccinated and treated during  
49 the trial. Application of the vaccination and drug treatment program used here, possibly with  
50 strategic use of anthelmintics also in the human population, is an effective option for  
51 reducing the incidence of neurocysticercosis in Nepal and elsewhere.

## 52 **Introduction**

53 Neurocysticercosis is a serious medical condition caused by infection in the brain or other  
54 nervous tissue with the larval stage of the parasite *Taenia solium*. The life cycle of the  
55 parasite involves pigs and humans in a prey-predator cycle. Humans are the obligatory  
56 definitive host for *T. solium* and harbour the adult tapeworm in the small intestine. Tapeworm  
57 eggs are released with the faeces and, if they are ingested by pigs, the larval cysticercus stage  
58 develops, principally in the muscle tissues. The life cycle is completed when humans eat  
59 insufficiently cooked, infected pig meat, leading to the development of a tapeworm. The  
60 serious medical consequences of *T. solium* infection arise because the eggs released by a  
61 tapeworm carrier are not only infective for pigs but can also cause cysticercosis if  
62 accidentally ingested by humans. In humans the cysticercus larvae have a propensity to  
63 encyst in the brain, causing neurocysticercosis, a common symptom of which is epilepsy.

64         The full life cycle of *T. solium* is perpetuated where sanitation conditions are poor,  
65 pigs have access to human faeces or food contaminated with human faeces, and where pork is  
66 ingested raw or poorly cooked. Hence, the full life cycle of *T. solium* is restricted to  
67 populations living in many of the poorest countries of the world. The propensity of *T. solium*  
68 to encyst in the brain of humans is responsible for the parasite causing 29% of seizure cases  
69 in areas where *T. solium* transmission occurs [1].

70         Human cysticercosis is one of a small number of diseases that have been formally  
71 recognised as being capable of being eradicated [2]. Improvements in sanitation and pig  
72 rearing practices in developed countries have led to a cessation in *T. solium* transmission,  
73 however attempts to institute cysticercosis control measures in poor communities have had  
74 limited success [3]. There has not as yet been an example where control activities specifically  
75 directed towards *T. solium* have had a sustained impact on disease transmission.

76 Control measures for *T. solium* that have been evaluated include treatment of human  
77 taeniasis cases with niclosamide or praziquantel, improvement in sanitation and other  
78 practices through public education, vaccination and medication of pigs, and improvement in  
79 pig rearing and meat inspection practices [3]. A major limitation to achieving a long-lasting  
80 reduction in neurocysticercosis has been the sustainability of *T. solium* control activities.  
81 Lightowlers and Donadeu [4] presented a logical model for control of *T. solium* transmission  
82 using a combination of vaccination and medication in pigs. Combined use of the TSOL18  
83 vaccine [5] and oxfendazole treatment [6] in all pigs at 3-monthly intervals was predicted to  
84 lead to a cessation of *T. solium* transmission by slaughter-age pigs within a year of initiation  
85 of the program [4].

86 *T. solium* neurocysticercosis is a major medical concern in Nepal where it has been  
87 determined to cause the highest burden of disease due to a parasitic infection [7]. Sah et al.  
88 [8] identified the Banke District in mid-western Nepal as having a high prevalence of porcine  
89 cysticercosis. Recently two new commercially produced and registered products  
90 manufactured according to Good Manufacturing Practice guidelines have become available  
91 for control of cysticercosis in pigs - the TSOL18 vaccine (Cysvax™) produced by Indian  
92 Immunologicals Limited, India, and Paranthic 10%™ an oxfendazole formulation  
93 manufactured by MCI Santé Animale, Morocco which is specifically registered for the  
94 treatment of porcine cysticercosis. These new products provide the opportunity for an  
95 assessment of a 3-monthly pig vaccination and treatment program on *T. solium* transmission.  
96 Here we describe the impact of these *T. solium* control measures implemented in pigs in the  
97 Banke district of Nepal.

## 98 **Materials and methods**

### 99 **Study design**

100 The study was conducted in Udaypur Village Development Committee (VDC) and Hirminiya  
101 & Betahani VDC of the Banke district in Nepal (81°37'E to 81°42'E, 27°90N to 28°20'N).  
102 Two distinct areas were involved, one a non-intervention area and the other an area where a  
103 combined intervention involving TSOL18 vaccination and oxfendazole treatment of pigs was  
104 undertaken. The study was designed to be able to identify an 80% reduction in the  
105 prevalence of porcine cysticercosis in slaughter-weight pigs. Sample size calculations were  
106 undertaken using a one-sided likelihood ratio test at the 5% significance level using SAS 9.3  
107 (SAS Institute, Cary North Carolina, USA) with the TWOSAMPLEFREQ command in the  
108 PROC POWER procedure. Assuming an initial prevalence of infection of 20%, sample sizes  
109 of 55 animals were required in each area at the start and end of the trial in order to meet the  
110 desired statistical power.

111 Two study areas were selected, each containing a total of at least 200 pigs. The  
112 eligibility criteria for animals that were enrolled in the study were indigenous breed pigs >8  
113 weeks of age, not heavily pregnant and not clinically ill. In the treatment area, animals that  
114 were destined for slaughter within 3 weeks were excluded in compliance with the  
115 withholding period for the oxfendazole formulation that was used [9]. At both the start and  
116 the end of the trial, a random selection of enrolled animals was assessed for cysticercosis by  
117 necropsy examination (detailed below), as this is the only reliable, sensitive and accurate  
118 method that is available to diagnose porcine cysticercosis [10].

119 In the intervention area, the day of first treatment administration to pigs was defined  
120 as Day 0. Pigs were enrolled and received their first treatment administration within a target  
121 period of 15 days. Subsequent administrations of treatments to pigs, including enrolment and  
122 treatment of new pigs, occurred at intervals of three months and on each occasion were  
123 completed within a target period of 15 days. The study had a duration of 12 months and  
124 hence involved 4 interventions.

125

## 126 Ethics

127 The study was approved by the Nepal Veterinary Council and was conducted adhering to the  
128 Council's requirements for animal husbandry.

129

## 130 Enrolment of pigs in the trial and pig management practices

131 For the animals that met the eligibility criteria, written informed consent was obtained from  
132 the farmers. In the intervention area 114 pig rearing households agreed to participate; three  
133 households declined to participate. In both the intervention and control areas, detailed  
134 information was recorded about farming and animal management practices. Farmers  
135 provided, or estimated, the age of every pig. In the intervention area, farmers were questioned  
136 about the origin and age of all new pigs and also about what had happened to any animal that  
137 had been present for one intervention but absent at a subsequent intervention visit.

138 Approximately 30% of piglets died before the age of 3-4 months. Classical Swine Fever  
139 (CSF) caused significant mortality. A minority of farmers vaccinate with commercial CSF  
140 vaccine – this generally being the only veterinary attention that the animals received.

## 141 Vaccination and oxfendazole treatment

142 The intervention team consisted of a registered veterinary doctor, two veterinary technicians  
143 and 2-4 pig catchers. After obtaining the consent of the owner, all pigs meeting the enrolment  
144 criteria were caught and numbered tags applied to both ears. Animal weight in kilograms was  
145 estimated using a measuring tape and the formula  $[\text{Girth}^2 \times \text{Length}/400]/2.2$ . The dose for  
146 oxfendazole (3ml/10kg Paranthic 10%<sup>TM</sup>, MCI Sante Animale, Morocco) was calculated  
147 according to the animal weight (30mg/kg body weight) and was applied *per os*. Concurrently,  
148 1ml TSOL18 vaccine (150 $\mu$ g TSOL18 recombinant protein in mineral oil adjuvant;  
149 Cysvax<sup>TM</sup>, Indian Immunologicals Limited, India) was administered intramuscularly in the  
150 left side of the neck behind the base of the ear, prior to release of the animal. A different  
151 needle was used for every vaccination. The procedures were undertaken swiftly and  
152 efficiently in order to minimize stress on the animals.

153

## 154 Post mortem procedures

155 Animals were purchased having a weight consistent with that at which pigs are commonly  
156 sold or slaughtered in the communities. Slaughter weight was determined through advice  
157 from the farmers; the mean weight of animals that the farmers indicated were available for  
158 slaughter (and which were purchased for post mortem analyses) was 70kg, although  
159 individual animal weights ranged from 35kg to more than 175kg. Necropsy procedures  
160 undertaken on 110 slaughter-weight pigs at the start of the intervention are described by Sah  
161 et al. [8]. Similar procedures were undertaken for the post mortem analyses at the end of the  
162 trial but with some variations, as follows. All staff involved in the post mortems were blinded  
163 as to whether the animals were from the control or intervention areas. Animals from both  
164 areas were necropsied in random order. The animals were transported to a licensed  
165 commercial abattoir in Nepalgunj Municipality, Banke where they were euthanized by



166 slaughter house staff according to normal commercial practice processes. The viscera were  
167 removed and the heart, liver, lungs, both kidneys and the full diaphragm retained in  
168 numbered containers. The organs and the two halves of the carcass, including the head, were  
169 refrigerated overnight at 4 °C, after which the carcass was skinned. The tongue, masticatory  
170 muscles (both right and left sides) and brain were removed and retained. The muscles from  
171 each side of the carcass were dissected from the bones and kept separately.

172

### 173 Examination for *Taenia solium* cysts

174 Except in cases of very heavy infection, all the retained organs and muscles of the right hand  
175 side of the carcass were sliced by hand at intervals of approximately 3mm and examined  
176 meticulously for the presence of *T. solium* cysticerci or other lesions. During the necropsies  
177 undertaken at the end of the trial, when no cysticerci were detected in the tongue, masticatory  
178 muscles, diaphragm, brain or muscles from the right hand side of the carcass, the muscles of  
179 the left hand side of the carcass were also sliced. Cysticerci were recorded as viable when  
180 they appeared as translucent vesicles filled with transparent fluid and having a visible white  
181 scolex. Non-viable lesions were recorded separately in cases where vesicles were non-  
182 translucent, containing a dense white or yellowish fluid and having no scolex and in cases of  
183 fibrosed or calcified lesions. Suspect, non-viable lesions that were not calcified were placed  
184 into RNA-later (Sigma) and investigated by PCR analysis of a fragment of the mitochondrial  
185 12S rDNA gene using the restriction enzymes *DdeI* and *HinfI* or *HpaI*, as described by  
186 Rodriguez-Hidalgo et al. [11], Devleeschauwer et al. [12] and Dermauw et al. [13]. In  
187 carcasses that contained thousands of cysts, all of the heart, liver, kidneys, lungs, diaphragm,  
188 tongue, masticatory muscles and brain were sliced and counted as above. The remaining  
189 carcass musculature was weighed and representative samples from different muscle sites  
190 were selected representing approximately 1kg. This sample was weighed accurately and then

191 sliced and counted as above and the number of cysts in the carcass muscles estimated from  
192 the total muscle weight.

193

## 194 Definition of a case of confirmed porcine cysticercosis

195 The definition of a confirmed case of cysticercosis which was adopted by Sah et al. [8] was  
196 also used here. An animal was determined to be a confirmed case of porcine cysticercosis if  
197 one or more viable *T. solium* cysticerci was found in the muscle and or the brain, or if more  
198 than one non-viable lesion was detected in the muscles and/or brain. Animals having only  
199 non-viable lesions in organs that are not typical locations for *T. solium* (eg the liver, lungs or  
200 kidneys), and which could not be confirmed as being *T. solium* by DNA analyses, were  
201 excluded. Direct comparisons of infection prevalence at the start and end of the trial were  
202 made on the basis of infections detected in the various organs examined as well as cysts  
203 found in the right hand side of the carcass, as this was the procedure used for the post  
204 mortems undertaken at the start of the trial [8].

205

## 206 Data analysis

207 Raw data was transcribed into pre-formatted Excel spreadsheets suitable for importation into  
208 Genstat® 18th edition. Statistical analysis was undertaken to evaluate the effect of treatments  
209 on the prevalence of *T. solium* cysts at post mortem. Prevalence results were compared within  
210 and between study groups, at baseline and end of study, using a two-sample binomial test. A  
211 generalised linear model with logit link function (logistic model) for binary data was also  
212 used to confirm results and to provide standard error estimates and confidence intervals  
213 around prevalence figures (Genstat® 18th edition).

## 214 Results

### 215 Pig populations in the study areas

216 At the start of the trial the total pig population in the control and intervention areas was 805  
217 pigs. In the intervention area there were 313 pigs in total, of which 227 met the inclusion  
218 criteria.

219

### 220 Interventions

221 In the intervention area, a total of 4 rounds of pig vaccination and oxfendazole treatments  
222 were carried out between August 2016 and May 2017. A total of 585 pigs were treated during  
223 the trial, with 209, 209, 207 and 203 receiving treatment in first, second, third and fourth  
224 interventions, respectively (Tables 1 and 2).

225

226 Table 1. Summary of pig vaccinations and oxfendazole treatments

| Intervention number | Number of pigs |                       |                          | Average pig weight (kg) | Number of pigs revaccinated <sup>1</sup> |    |    |
|---------------------|----------------|-----------------------|--------------------------|-------------------------|------------------------------------------|----|----|
|                     | Total          | Eligible <sup>2</sup> | Treated (%) <sup>3</sup> |                         | 1                                        | 2  | 3  |
| 1                   | 313            | 227                   | 209 (92.1%)              | 30.5                    | -                                        |    |    |
| 2                   | 317            | 231                   | 209 (90.5%)              | 33.2                    | 99                                       |    |    |
| 3                   | 280            | 217                   | 207 (95.4%)              | 27.5                    | 46                                       | 81 |    |
| 4                   | 279            | 213                   | 203 (95.3%)              | 23.8                    | 10                                       | 27 | 43 |

227 <sup>1</sup> Number of pigs receiving their second and/or subsequent vaccination at the second, third and final intervention.

228 <sup>2</sup> Number of animals that fit the eligibility criteria

229 <sup>3</sup> Not all animals could be found or caught at the time of the treatment

230 Table 2. Animals treated or not treated in the intervention area and the reasons why some  
 231 animals were not treated

| Intervention | Vaccinated<br>& drug<br>treated | Pigs not treated |      |                 |                    | Total |
|--------------|---------------------------------|------------------|------|-----------------|--------------------|-------|
|              |                                 | Pregnant         | Sick | Age <8<br>weeks | Other <sup>1</sup> |       |
| First        | 209                             | 20               | 4    | 62              | 18                 | 313   |
| Second       | 209                             | 29               | 4    | 53              | 22                 | 317   |
| Third        | 207                             | 11               | 5    | 47              | 10                 | 280   |
| Fourth       | 203                             | 13               | 10   | 43              | 10                 | 279   |
| Total        | 828                             | 73               | 23   | 205             | 60                 | 1189  |

232 <sup>1</sup> Pigs that were unable to be caught.

233

234

235 Interventions delivered to individual pigs are summarized in Table 3. Of the 209 animals  
 236 receiving the vaccination and drug treatment during the first intervention period, 95 animals  
 237 were absent at the time of the second intervention. The reasons for absence were: unable to  
 238 be caught (12 animals), 2 had died, 32 had been sold or consumed locally, and 33 were  
 239 otherwise ineligible for inclusion in the second round of interventions (4 were ill; 29 in late  
 240 pregnancy). The remaining 16 animals were absent for unknown reasons although several  
 241 were present and treated at a subsequent intervention time. Thirteen animals were not  
 242 available for the second round of interventions but were present and received treatment either  
 243 during the third intervention period (12 animals) or fourth intervention period (2 animals).  
 244 Three animals which were vaccinated and drug treated at the second intervention were absent  
 245 at the third intervention period but were present and treated during the fourth intervention.  
 246 The number of animals which were unable to be caught decreased as the trial progressed such  
 247 that approximately 95% of eligible animals received their vaccinations and oxfendazole  
 248 treatments during the third and fourth rounds of intervention.

249 Table 3: Number of pigs receiving vaccination and oxfendazole treatments and the  
 250 interventions in which individual animals received treatment.  
 251

|              | Intervention number(s) |   |   | No. Pigs treated |
|--------------|------------------------|---|---|------------------|
| 1            | -                      | - | - | 95               |
| 1            | 2                      | - | - | 64               |
| 1            | 2                      | 3 | - | 28               |
| 1            | 2                      | 3 | 4 | 5                |
| 1            | -                      | 3 | - | 12               |
| 1            | -                      | 3 | 4 | 1                |
| 1            | 2                      | - | 4 | 2                |
| 1            | -                      | - | 4 | 2                |
|              | 2                      | - | - | 59               |
|              | 2                      | 3 | - | 31               |
|              | 2                      | 3 | 4 | 17               |
|              | 2                      |   | 4 | 3                |
|              |                        | 3 | - | 93               |
|              |                        | 3 | 4 | 20               |
|              |                        |   | 4 | 153              |
| <b>TOTAL</b> |                        |   |   | <b>585</b>       |

252

253

254 **Veterinary interventions, adverse reactions and farmer attitudes to the**  
 255 **intervention**

256 During the trial there were 28 pigs which required treatment for wounds (including 13 ear  
 257 wounds, six scrotal wounds), 11 for respiratory infections and one animal noted with a  
 258 neurological condition. Treatments administered were long acting oxytetracycline or  
 259 sulphonamide/ trimethoprim, meloxicam as well as topical treatment of the wounds.

260 No adverse reactions to either vaccination or oxfendazole treatment were noted by the  
 261 field staff or reported by the farmers (who were asked specifically about the issue). No  
 262 injection site lesions were noted. Many farmers however were reluctant to have ear tags  
 263 placed on their animals, especially since some animals developed ear infections following the  
 264 first intervention. There was no reluctance on the part of the farming community to their

265 animals being either vaccinated or given anthelmintic drench. Farmers were pleased to see  
266 worms voided in the feces after the animals were treated.

## 267 Post mortem examination

268 The pigs that underwent post mortem examination at the end of the trial were from 8 to 48  
269 months of age and weighed from 35 to 175 kilograms, mean 89kg. The number of  
270 interventions and individual treatments received by the animals in the intervention area that  
271 underwent post mortem at the end of the study, are summarized in Table 4.

272

273 Table 4. Records of the 33 animals from the *T. solium* intervention  
274 area that were assessed in post mortem.

275

| Number of interventions | Number of pigs | Intervention(s) received |   |   |   |
|-------------------------|----------------|--------------------------|---|---|---|
| 1                       | 1              |                          |   |   | 1 |
| 2                       | 1              | 1                        |   |   | 3 |
|                         | 1              | 1                        | 2 |   |   |
|                         | 2              |                          | 2 |   | 3 |
|                         | 2              |                          | 2 |   | 4 |
|                         | 10             |                          |   | 3 | 4 |
| 3                       | 5              | 1                        | 2 | 3 |   |
|                         | 1              | 1                        | 2 |   | 4 |
|                         | 1              | 1                        |   | 3 | 4 |
|                         | 8              |                          | 2 | 3 | 4 |
| 4                       | 1              | 1                        | 2 | 3 | 4 |

276 Shown are the number of interventions the individual animals received and at  
277 which intervention period(s) they were treated.

278

279 Thirty three animals from the intervention area were examined at most mortem, among which  
280 one animal had received a single intervention treatment, 16 animals had received 2  
281 intervention treatments, 13 had received 3 treatments and 1 animal had received all 4  
282 treatments.

## 283 Prevalence and intensity of *T. solium* infection

284 The numbers of animals recorded as having *T. solium* infection in animals from the control  
 285 and intervention areas, assessed at necropsy at the start and the end of the trial, are  
 286 summarized in Table 5. Among the animals necropsied at the start of the trial, nineteen out of  
 287 55 (34.6%) pigs were positive from the intervention area, and thirteen out of 55 (23.6%) pigs  
 288 were positive from the control area (not significant,  $p=0.207$ ). The total prevalence of porcine  
 289 cysticercosis (PC) was 29.1%. Approximately 9-10 months after the first intervention, 33  
 290 pigs from the intervention area and 35 pigs from the control area were subjected to post  
 291 mortem to determine the presence of *T. solium* cysts. Zero out of 33 (0%) pigs were positive  
 292 from the intervention group and six out of 35 (17.1%) pigs were positive from the control  
 293 group (significant,  $p=0.004$ ). The pre-intervention prevalence of infection was significantly  
 294 greater than the post intervention prevalence in the intervention area ( $p<0.001$ ). In the control  
 295 area there was no significant difference between the baseline and end of study prevalence of  
 296 infection with *T. solium* ( $p=0.424$ ).

297  
 298 Table 5. Prevalence of *T. solium* infections detected in pigs from the intervention and control areas  
 299 of Nepal

| Study area   | Baseline necropsies <sup>1</sup> |                 |            | End of study necropsy              |                 |            |
|--------------|----------------------------------|-----------------|------------|------------------------------------|-----------------|------------|
|              | Total animals necropsied         | Number infected | % positive | Total animals necropsied           | Number infected | % positive |
|              |                                  |                 |            | Including RHS carcass <sup>2</sup> |                 |            |
| Intervention | 55                               | 19              | 34.5%      | 33                                 | 0               | 0%         |
| Control      | 55                               | 13              | 23.6%      | 35                                 | 6               | 17.1%      |
|              |                                  |                 |            | Including complete carcass         |                 |            |
| Intervention |                                  |                 |            | 33                                 | 0               | 0%         |
| Control      |                                  |                 |            | 35                                 | 8               | 22.9%      |

301 <sup>1</sup> Data from Sah et al. (2017); <sup>2</sup> Heart, masseters, tongue, diaphragm, brain, liver, lungs plus right hand side skeletal musculature.

303 The number of both viable and non-viable cysts was counted according to the criteria  
304 specified for a confirmed case of *T. solium* infection, including the number in the full carcass  
305 estimated by doubling the cyst number found in the skeletal muscles of the right hand side of  
306 the carcass. The baseline post mortems revealed 8,347 (viable 7,379: non-viable 968) cysts in  
307 animals from both the control and intervention areas, with 7,039 cysts (viable 6,694: non-  
308 viable 345) in 19 pigs (average per infected animal  $370.5 \pm 537.5$ ) from the intervention area  
309 and 1308 cysts (viable 685, non-viable 623) from 13 pigs (average  $100.6 \pm 145.0$ ) from the  
310 control area. There were fewer cysts found at the end of study post mortems, with 120 cysts  
311 identified in six pigs (average  $20.0 \pm 24.0$ ) from the control area and none found to be infected  
312 in the intervention area. All animals that were recorded as having no *T. solium* infection  
313 detected in the heart, masseters, tongue, right hand carcass musculature, brain, liver or lungs  
314 had the remaining carcass musculature (the left hand side) sliced to determine whether there  
315 was any infection in the carcass at all. Two further animals were identified as being infected  
316 from the control area; one with a single viable cyst and one animal with two viable cysts only  
317 in the skeletal muscles from the left hand side of the carcass. No infection was detected,  
318 either viable or non-viable cysts, in any of the 33 animals from the intervention area after  
319 complete dissection of the carcasses (Table 5).

320 A total of 145 pigs that had no vaccination or drug treatment (110 animals at the start  
321 of the trial plus 35 from the control region at the end of the trial) were subjected to detailed  
322 necropsy. This included careful slicing of the entire brain. Nine of these animals had one or  
323 more viable *T. solium* cysticerci in the brain. All those with cysts in the brain also had viable  
324 cysts in one or more muscle tissues. None of the 33 pigs from the intervention area had any *T.*  
325 *solium* cysts in the brain.



326 Analysis of the characteristics of all animals that were found to be infected with *T.*  
327 *solium* (33 at the start of the intervention and 21 at the end of the intervention; Supplementary  
328 Data) in comparison to the total number of animals that were necropsied at baseline and from  
329 the control area at the end of the trial, found no significant relationship between the age of the  
330 animals and the proportion of infected animals in the age range between 7 and >19 months of  
331 age (Pearson's correlation coefficient 0.189, P=0.76; Fig 1). There was also no significant  
332 relationship between the percentage viability of cysts found in individual animals and the age  
333 of the pigs (Pearson's correlation coefficient 0.188, P=0.28), nor between the intensity of  
334 infection (total number of cysts) and the age of the animal (Pearson's correlation coefficient  
335 0.133, P=0.45).

336

337 **Fig 1. Proportion of pigs in different age classes from the Banke district of Nepal found**  
338 **to be infected with *Taenia solium*.** Pigs of the different age classes shown were selected at  
339 random from a population of animals naturally exposed to infection in the Banke District of  
340 Nepal and assessed for infection by comprehensive investigations undertaken at necropsy.

341

342

343

## 344 Discussion

345 Following implementation of 3-monthly treatments of the pig population in a *T. solium*  
346 endemic region of Banke District, Nepal, transmission of the parasite was eliminated among  
347 the animals that were assessed at the end of the study. Comparison of the number of infected  
348 animals found in the intervention and control areas indicates that the intervention led to a  
349 significant reduction in porcine cysticercosis (P=0.004; Table 5). This change in the risk of *T.*  
350 *solium* transmission is also evident when comparing the starting prevalence of infection in the  
351 intervention area with the prevalence of infection in the same area seen at the end of the

352 intervention ( $P < 0.001$ ). There was a reduction in the prevalence of *T. solium* prevalence  
353 between the start and the end of the trial in the control area, however this was not significant  
354 ( $P = 0.424$ ). Fewer animals were able to be purchased for necropsy at the end of the trial than  
355 had been intended. Nevertheless, significant differences were seen between the prevalence of  
356 infection at the start and end of the trial, as well as between the intervention and control areas  
357 at the end of the trial, due to the higher prevalence of infection than expected at the start and  
358 the magnitude of the intervention's impact on cysticercosis transmission.

359         The 3-monthly vaccination and oxfendazole treatment regime was implemented over  
360 an approximately 10 month period prior to the post mortem assessments being undertaken at  
361 the end of the trial. As the animals selected for assessment were based on them being of a  
362 size and age at which pigs from the area are generally sold or slaughtered, most of the  
363 animals assessed had been present for at least two of the interventions (Table 4). The  
364 treatment schedule which was assessed was determined to be the most effective in an area  
365 where animals are consumed from 7 months of age [14]. Available evidence suggests that  
366 immunity stimulated by the TSOL18 vaccine requires two immunizations with the currently  
367 available vaccine [15]. Excellent secondary responses to the vaccine are seen when the  
368 interval between vaccinations is between one and four months [16], hence the vaccination  
369 scheme adopted in this trial would be predicted to provide a high level of immunity. The  
370 level of protection achieved in this trial is similar to what was achieved in a previous field  
371 trial undertaken in Cameroon which involved a cohort of animals, rather than an on-going  
372 intervention program that was implemented in this trial in Nepal [17].

373         An estimate of the age at which animals were sent for slaughter was determined from  
374 the information obtained about animals that were present for the second intervention but had  
375 been sold prior to the third intervention, together with those that were present at the time of  
376 the third intervention but had been sold prior to the fourth intervention. Excluding animals

377 that were absent for reasons such as them having died, being pregnant or ill, this information  
378 provided the age of the animals at which they were sold. On this basis, the typical age at  
379 slaughter of pigs in these communities was found to be 14 months when the animals were at  
380 least 60kg.

381 Data obtained from the animals that were not part of the intervention provide valuable  
382 information about the age at which pigs acquire *T. solium* infection in a natural endemic  
383 situation. Very little information is available concerning this topic. No significant  
384 relationship was evident among all the animals that were confirmed to have *T. solium*  
385 infection between the age of the animals and the proportion that was infected (Fig 1).  
386 Assuming that the infections acquired in young pigs persist, these data suggest that pigs  
387 acquire infection relatively early in life and that additional infections do not accumulate as  
388 the animals age. An hypothesis that would be consistent with these data would be that pigs  
389 older than approximately 1 year are relatively resistant to infection. Age-related resistance to  
390 infection is recognised in the intermediate hosts of other *Taenia* species [18].

391 None of the animals from the intervention area in Nepal were found to have *T. solium*  
392 in the brain tissue, whereas 9 of 145 untreated pigs were found to have cysts in the brain. This  
393 difference is not statistically significant, however the absence of cysts in vaccinated and  
394 treated pigs is consistent with the results of previous trials with the TSOL18 vaccine in which  
395 vaccinated animals also had no cysts in the brain [5, 17, 19].

396 The post mortem investigations undertaken at the start of the trial in Nepal included  
397 slicing of half the carcass musculature in addition to the heart, masseters, diaphragm, tongue,  
398 brain, liver, kidneys and lungs. Post mortems undertaken at the end of the trial involved the  
399 same procedures, such that direct comparisons could be made between results from the two  
400 sets of data. However, for all animals in which no cysticerci were found during the post  
401 mortems carried out at the end of the trial, the remaining musculature (left hand side carcass)

402 was also sliced. In the case of the animals from the intervention area, none was recorded as  
403 having any cysts in the entire carcass musculature or other tissues that were examined. In the  
404 36 control animals, two additional infected animals were identified, one having a single  
405 viable cyst and the other having two viable cysts in the left hand side musculature, but no  
406 cysts elsewhere. In this group of 36 infected animals from the control area most had light  
407 infections. Identification of infected animals by slicing muscles only from one side of the  
408 carcass, rather than the entire carcass musculature, would have missed 25% of the infected  
409 animals (2 of 8 infected). Chembensofu et al. [20] found that slicing predilection sites plus  
410 only one side of the carcass musculature would have missed 16% of the infected animals in  
411 their study undertaken with naturally infected pigs in Zambia.

412         During the post mortems all carcass lesions and lesions in the brain, liver, kidneys and  
413 lungs were examined for the presence of a cysticercus. No cysticerci were found other than  
414 in striated muscle tissue and the brain. Necrotic lesions and other suspect lesions were  
415 investigated for the presence of taeniid or *T. solium* DNA. No *T. solium* lesions were  
416 identified by these methods other than in the brain and striated muscle. These data are  
417 consistent with the tissue distribution of *T. solium* cysticerci in many previous studies,  
418 including the comprehensive investigations undertaken by Boa et al. [21] on naturally  
419 infected pigs in Tanzania, the majority of which were heavily infected. These data, however,  
420 contrast with those reported by Chembensofu et al. [20], who found large numbers of viable,  
421 DNA-confirmed cysticerci in the liver, lungs and kidneys of many pigs from Zambia. There  
422 is no clear explanation for this discrepancy.

423         Potentially effective control measures for *T. solium* have been available now for  
424 decades and yet they have not been implemented anywhere as specific strategies that have led  
425 to a sustained reduction in neurocysticercosis [3]. Feasibility and sustainability of control  
426 measures have been the stumbling block to controlling *T. solium*. The requirement for a 21-

427 day withholding period after oxfendazole treatment of pigs, creation of necrotic lesions in the  
428 meat of drug-treated, infected pigs, and difficulties with reliably predicting the time of sale or  
429 slaughter, prevent a treat-immediately-before-slaughter approach being used in pigs to  
430 control *T. solium*. To be effective, the frequency with which intervention would need to be  
431 undertaken in the pig population is governed by the rapid turnover of pigs in the communities  
432 and constant introduction of new, susceptible animals into the population due to pigs  
433 breeding throughout the year.

434 Combining both vaccination and oxfendazole as a preventative treatment for porcine  
435 cysticercosis has several advantages. Firstly, the drug treatment eliminates any viable cysts  
436 that may be in an animal's musculature prior to the animal being protected after vaccination.  
437 Secondly, the drug treats many nematode and trematode infections, as well as cysticercosis,  
438 likely providing a health and productivity boost to the treated animals [22, 23]. Oxfendazole  
439 treatment does not provide any protection for uninfected pigs against subsequent exposure to  
440 the *T. solium*, hence combined use with the vaccine provides both treatment as well as  
441 prevention from subsequent infection. After treatment of an infected pigs with oxfendazole  
442 necrotic lesions are evident in the musculature for a period of at least several weeks; the great  
443 majority disappearing within a period of 3 months [6, 24, 25]. It seems likely that some of the  
444 animals from the intervention area in Nepal that underwent post mortem investigation would  
445 have been infected with *T. solium* prior to them being fully vaccinated. However no non-  
446 viable lesions were detected in the muscles of the animals that had participated in the  
447 interventions. The three-monthly treatment regime that was implemented in the trial appears  
448 to have allowed sufficient time for any lesions that were the result of the death of parasites in  
449 muscles after medication to be resorbed before the animals reached slaughter age.

450 A limitation to the use of oxfendazole as a treatment for porcine cysticercosis is the  
451 requirement for a 3 week withholding period after treatment before slaughter due to the

452 presence of drug residues in the tissues [9]. In the intervention described here, all animals  $\geq 2$   
453 months of age were treated (other than sows near parturition). Farmers were requested to not  
454 sell or kill the treated animals for 3 weeks after each treatment. This imposes a significant  
455 burden on the farmers, especially when the procedure is repeated every 3 months, and it is  
456 difficult to monitor compliance. Also, the farmer's requirements about selling animals can  
457 change rapidly; a family illness or other unforeseen event can impose an urgent need to sell  
458 animals. The *T. solium* transmission modelling presented by Lightowers and Donadeu [4]  
459 predicted that a 3-monthly program of vaccination plus oxfendazole treatment of pigs  
460 between one and 7 months of age would eliminate *T. solium* infection entirely from pigs  $> 7$   
461 months of age such that they would not require further oxfendazole treatment. Cessation of  
462 drug treatment of animals that are approaching slaughter age would reduce or prevent the risk  
463 that animals with high levels of drug residues could be consumed as well as reducing the  
464 cost. The intervention program that was applied in the trial in Nepal involved animals of all  
465 ages ( $> 2$  months). Introduction of a new 3-monthly treatment program in an area would  
466 necessarily involve all pigs to start, so as to treat and protect all the existing animals.  
467 However, immunity induced by 2 immunizations with the Cysvax vaccine, together with a  
468 natural resistance to *T. solium* infection in animals  $> 1$  year of age (mentioned above), may  
469 allow a continuing program involving vaccination plus oxfendazole medication to be  
470 effective if it were only implemented in animals up to 7 months of age [4].

471         The intervention that was undertaken in this trial in Nepal was relatively simple.  
472 Groups of 5-6 persons travelled by motorbike. The most time-consuming aspect of the  
473 intervention was catching the animals; having caught a pig, vaccination and drug treatment  
474 took just a few moments. The older animals were generally the more difficult and time  
475 consuming to catch. Based on the experience gained in conducting this trial in Nepal, teams  
476 of 5-6 persons who were undertaking a similar, but on-going cysticercosis control program

477 implemented in pigs up to 7 months of age, would be able to vaccinate and drug treat  
478 approximately 100 pigs per day in Dalit communities such as those in the Banke district.

479         The three-monthly intervention scheme adopted here was predicted to, and did, lead  
480 to the cessation of the risk of *T. solium* transmission by the vaccinated and drug-treated  
481 animals. Any intervention limited to the pig population would not immediately affect the  
482 incidence of cysticercosis in humans because it would take time for the prevalence of human  
483 *T. solium* taeniasis to decline as new cases of taeniasis were prevented due to the absence of  
484 cysticercosis in pigs. Calculations based on the rate of re-establishment of taeniasis following  
485 mass treatment of communities [26] suggest that *T. solium* tapeworms have a lifespan of 2-3  
486 years; a lifespan of less than 5 years is also suggested by epidemiological evidence [27]. If  
487 this were the case, implementation of an on-going intervention only in pigs would lead to a  
488 substantial reduction in, or elimination of, the incidence of human cysticercosis within about  
489 2-3 years. Alternatively, a single treatment of the human population for taeniasis after porcine  
490 cysticercosis was controlled, would lead to a more immediate reduction in the incidence of  
491 human cysticercosis [3, 4]. Although it was not tested here, evidence about the duration of  
492 protection afforded by the TSOL18 vaccine [17] and *T. solium* transmission modelling [4]  
493 would suggest that a 3-monthly vaccination and drug treatment regime would be effective if  
494 applied only to animals up to 7 months of age, with re-vaccination only of animals kept for  
495 long periods, for example, for breeding purposes. We propose that this would be an effective,  
496 relatively simple and feasible control strategy for *T. solium* which could be applied to reduce  
497 the incidence of neurocysticercosis in Nepal and elsewhere. The feasibility of this approach  
498 has been enhanced by the availability of an effective vaccine and medication, with both  
499 becoming available, for the first time, as commercial products licensed for use in pigs for *T.*  
500 *solium* cysticercosis.

## 501 **Acknowledgements**

502 The authors acknowledge the logistic supports made available by the Heifer Nepal team and  
503 administrative support from District Livestock Service Office (DLSO), Nepalgunj, Banke.  
504 Valuable contributions were made by the following government veterinary officers: Dr Bed  
505 Bahadur KC Senior Veterinary Officer, District Livestock Service Office, Banke, Nepal, Dr  
506 Krishna Raj Pandey Senior Veterinary Officer, Regional Veterinary Laboratory, Surkhet,  
507 Nepal, Dr Sankar Pandey Senior Veterinary Officer, Animal Quarantine Office, Nepalgunj,  
508 Nepal and Dr Dinesh Kumar Yadav Animal Scientist, National Agriculture Research  
509 Council, Khajura, Nepal. Participants in the necropsy team included Dr. Nirjal Dhakal, Dr.  
510 Deepak Lamsal, Dr. Sauroj Shrestha, Bishal Chand, Rakesh Chand, Niraj Dhakal, Manish  
511 Gautum, Bedika Ghising, Santosh Gyawali, Rupak Kandel, Romi Kunwar, Jitendra Lama,  
512 Bishal Maharjan, Sikesh Manandhar, Sanjay Poudel, Saurav Shrestha and Kaberi Sing, Richa  
513 Singh and Simon Singh. We thank Ms Jane Poole for statistical analyses and Ms Lizzie  
514 Chesang for data curation. The findings and conclusions contained within are those of the  
515 authors and do not necessarily reflect positions or policies of the Bill & Melinda Gates  
516 Foundation nor the UK Government.



## 517 **References**

- 518 1. Ndimubanzi PC, Carabin H, Budke CM, Nguyen H, Qian YJ, Rainwater E, et al. A  
519 systematic review of the frequency of neurocysticercosis with a focus on people with  
520 epilepsy. PLoS Negl Trop Dis. 2010;4(11):e870. Epub 2010/11/13. doi:  
521 10.1371/journal.pntd.0000870. PubMed PMID: 21072231; PubMed Central PMCID:  
522 PMC2970544.
- 523 2. Schantz PM, Cruz M, Sarti E, Pawlowski Z. Potential eradicability of taeniasis and  
524 cysticercosis. Bull Pan Am Health Organ. 1993;27:397-403.
- 525 3. Lightowers MW. Control of *Taenia solium* taeniasis/cysticercosis: past practices and  
526 new possibilities. Parasitology. 2013;140(13):1566-77. doi:  
527 10.1017/s0031182013001005. PubMed PMID: CABI:20133367394.
- 528 4. Lightowers MW, Donadeu M. Designing a minimal intervention strategy to control  
529 *Taenia solium*. Trends Parasitol. 2017;33(6):426-34. doi: 10.1016/j.pt.2017.01.011.  
530 PubMed PMID: 28236521.
- 531 5. Flisser A, Gauci CG, Zoli A, Martinez-Ocana J, Garza-Rodriguez A, Dominguez-  
532 Alpizar JL, et al. Induction of protection against porcine cysticercosis by vaccination  
533 with recombinant oncosphere antigens. Infect Immun. 2004;72(9):5292-7. PubMed  
534 PMID: 15322025.
- 535 6. Gonzales AE, Garcia HH, Gilman RH, Gavidia CM, Tsang VC, Bernal T, et al.  
536 Effective, single-dose treatment of porcine cysticercosis with oxfendazole. Am J Trop  
537 Med Hyg. 1996;54(4):391-4. PubMed PMID: 8615453.
- 538 7. Devleeschauwer B, Ale A, Torgerson P, Praet N, Maertens de Noordhout C, Pandey  
539 BD, et al. The burden of parasitic zoonoses in Nepal: a systematic review. PLoS Negl  
540 Trop Dis. 2014;8(1):e2634. Epub 2014/01/07. doi: 10.1371/journal.pntd.0002634.  
541 PubMed PMID: 24392178; PubMed Central PMCID: PMC3879239.

- 542 8. Sah K, Poudel I, Subedi S, Singh DK, Cocker J, Kushwaha P, et al. A hyperendemic  
543 focus of *Taenia solium* transmission in the Banke District of Nepal. *Acta Trop.*  
544 2017;176:78-82. doi: 10.1016/j.actatropica.2017.07.022. PubMed PMID: 28739367;  
545 PubMed Central PMCID: PMCPMC5644834.
- 546 9. Moreno L, Lopez-Urbina MT, Farias C, Domingue G, Donadeu M, Dungu B, et al. A  
547 high oxfendazole dose to control porcine cysticercosis: pharmacokinetics and tissue  
548 residue profiles. *Food Chem Toxicol.* 2012;50(10):3819-25. Epub 2012/07/31. doi:  
549 S0278-6915(12)00501-7 [pii]10.1016/j.fct.2012.07.023. PubMed PMID: 22841955.
- 550 10. Lightowers MW, Garcia HH, Gauci CG, Donadeu M, Abela-Ridder B. Monitoring the  
551 outcomes of interventions against *Taenia solium*: options and suggestions. *Parasite*  
552 *Immunol.* 2016;38(3):158-69. Epub 2015/11/06. doi: 10.1111/pim.12291. PubMed  
553 PMID: 26538513; PubMed Central PMCID: PMC4819694.
- 554 11. Rodriguez-Hidalgo R, Geysen D, Benitez-Ortiz W, Geerts S, Brandt J. Comparison of  
555 conventional techniques to differentiate between *Taenia solium* and *Taenia saginata*  
556 and an improved polymerase chain reaction-restriction fragment length polymorphism  
557 assay using a mitochondrial 12S rDNA fragment. *J Parasitol.* 2002;88(5):1007-11. doi:  
558 10.1645/0022-3395(2002)088[1007:COCTTD]2.0.CO;2. PubMed PMID: 12435145.
- 559 12. Devleesschauwer B, Aryal A, Tharmalingam J, Joshi DD, Rijal S, Speybroeck N, et al.  
560 Complexities in using sentinel pigs to study *Taenia solium* transmission dynamics  
561 under field conditions. *Vet Parasitol.* 2013;193(1-3):172-8. Epub 2013/01/10. doi:  
562 S0304-4017(12)00658-9 [pii] 10.1016/j.vetpar.2012.12.010. PubMed PMID:  
563 23298565.
- 564 13. Dermauw V, Ganaba R, Cisse A, Ouedraogo B, Millogo A, Tarnagda Z, et al. *Taenia*  
565 *hydatigena* in pigs in Burkina Faso: A cross-sectional abattoir study. *Vet Parasitol.*

- 566 2016;230:9-13. doi: 10.1016/j.vetpar.2016.10.022. PubMed PMID: 27884445; PubMed  
567 Central PMCID: PMCPMC5126229.
- 568 14. Lightowers MW, Donadeu M. Designing a minimal intervention strategy to control  
569 *Taenia solium*. Trends Parasitol. 2017. doi: 10.1016/j.pt.2017.01.011. PubMed PMID:  
570 28236521.
- 571 15. Jayashi CM, Gonzalez AE, Castillo Neyra R, Kyngdon CT, Gauci CG, Lightowers  
572 MW. Characterisation of antibody responses in pigs induced by recombinant  
573 oncosphere antigens from *Taenia solium*. Vaccine. 2012;30(52):7475-80. Epub  
574 2012/11/03. doi: S0264-410X(12)01503-4 [pii] 10.1016/j.vaccine.2012.10.057.  
575 PubMed PMID: 23116696.
- 576 16. Lightowers MW, Donadeu M, Elaiyaraja M, Maithal K, Kumar KA, Gauci CG, et al.  
577 Anamnestic responses in pigs to the *Taenia solium* TSOL18 vaccine and implications  
578 for control strategies. Parasitology. 2016;143(4):416-20. Epub 2016/02/20. doi:  
579 10.1017/S0031182016000202. PubMed PMID: 26892239.
- 580 17. Assana E, Kyngdon CT, Gauci CG, Geerts S, Dorny P, De Deken R, et al. Elimination  
581 of *Taenia solium* transmission to pigs in a field trial of the TSOL18 vaccine in  
582 Cameroon. IntJParasitol. 2010;40(5):515-9. Epub 2010/02/09. doi: S0020-  
583 7519(10)00025-1 [pii] 10.1016/j.ijpara.2010.01.006. PubMed PMID: 20138046;  
584 PubMed Central PMCID: PMC2856920.
- 585 18. Rickard MD, Williams JF. Hydatidosis/cysticercosis: immune mechanisms and  
586 immunization against infection. AdvParasitol. 1982;21:229-96.
- 587 19. Gonzalez AE, Gauci CG, Barber D, Gilman RH, Tsang VC, Garcia HH, et al.  
588 Vaccination of pigs to control human neurocysticercosis. Am J Trop Med Hyg.  
589 2005;72(6):837-9. PubMed PMID: 15964973.

- 590 20. Chembensofu M, Mwape KE, Van Damme I, Hobbs E, Phiri IK, Masuku M, et al. Re-  
591 visiting the detection of porcine cysticercosis based on full carcass dissections of  
592 naturally *Taenia solium* infected pigs. *Parasites & Vectors*. 2017;10(1):572. doi:  
593 10.1186/s13071-017-2520-y. PubMed PMID: 29145875; PubMed Central PMCID:  
594 PMC5693468.
- 595 21. Boa ME, Kassuku AA, Willingham AL, 3rd, Keyyu JD, Phiri IK, Nansen P.  
596 Distribution and density of cysticerci of *Taenia solium* by muscle groups and organs in  
597 naturally infected local finished pigs in Tanzania. *Vet Parasitol*. 2002;106(2):155-64.  
598 PubMed PMID: 12031817.
- 599 22. Alvarez L, Saumell C, Fuse L, Moreno L, Ceballos L, Domingue G, et al. Efficacy of a  
600 single high oxfendazole dose against gastrointestinal nematodes in naturally infected  
601 pigs. *Vet Parasitol*. 2013;194(1):70-4. Epub 2013/01/30. doi:  
602 10.1016/j.vetpar.2013.01.003. PubMed PMID: 23357598.
- 603 23. Ortiz P, Terrones S, Cabrera M, Hoban C, Ceballos L, Moreno L, et al. Oxfendazole  
604 flukicidal activity in pigs. *Acta Trop*. 2014;136:10-3. Epub 2014/04/10. doi:  
605 10.1016/j.actatropica.2014.03.024. PubMed PMID: 24713198.
- 606 24. Sikasunge CS, Johansen MV, Willingham AL, 3rd, Leifsson PS, Phiri IK. *Taenia*  
607 *solium* porcine cysticercosis: viability of cysticerci and persistency of antibodies and  
608 cysticercal antigens after treatment with oxfendazole. *Vet Parasitol*. 2008;158(1-2):57-  
609 66. Epub 2008/10/07. doi: S0304-4017(08)00418-4 [pii] 10.1016/j.vetpar.2008.08.014.  
610 PubMed PMID: 18834668.
- 611 25. Gonzalez AE, Falcon N, Gavidia C, Garcia HH, Tsang VC, Bernal T, et al. Time-  
612 response curve of oxfendazole in the treatment of swine cysticercosis. *Am J Trop Med*  
613 *Hyg*. 1998;59(5):832-6. Epub 1998/12/05. PubMed PMID: 9840607.

- 614 26. Lightowers MW. Eradication of *Taenia solium* cysticercosis: a role for vaccination of  
615 pigs. *IntJParasitol.* 2010;40(10):1183-92. Epub 2010/05/18. doi: S0020-  
616 7519(10)00157-8 [pii] 10.1016/j.ijpara.2010.05.001. PubMed PMID: 20470777.
- 617 27. Garcia HH, Gilman RH, Gonzalez AE, Verastegui M, Rodriguez S, Gavidia C, et al.  
618 Hyperendemic human and porcine *Taenia solium* infection in Peru. *Am J Trop Med*  
619 *Hyg.* 2003;68(3):268-75. PubMed PMID: 12685628.

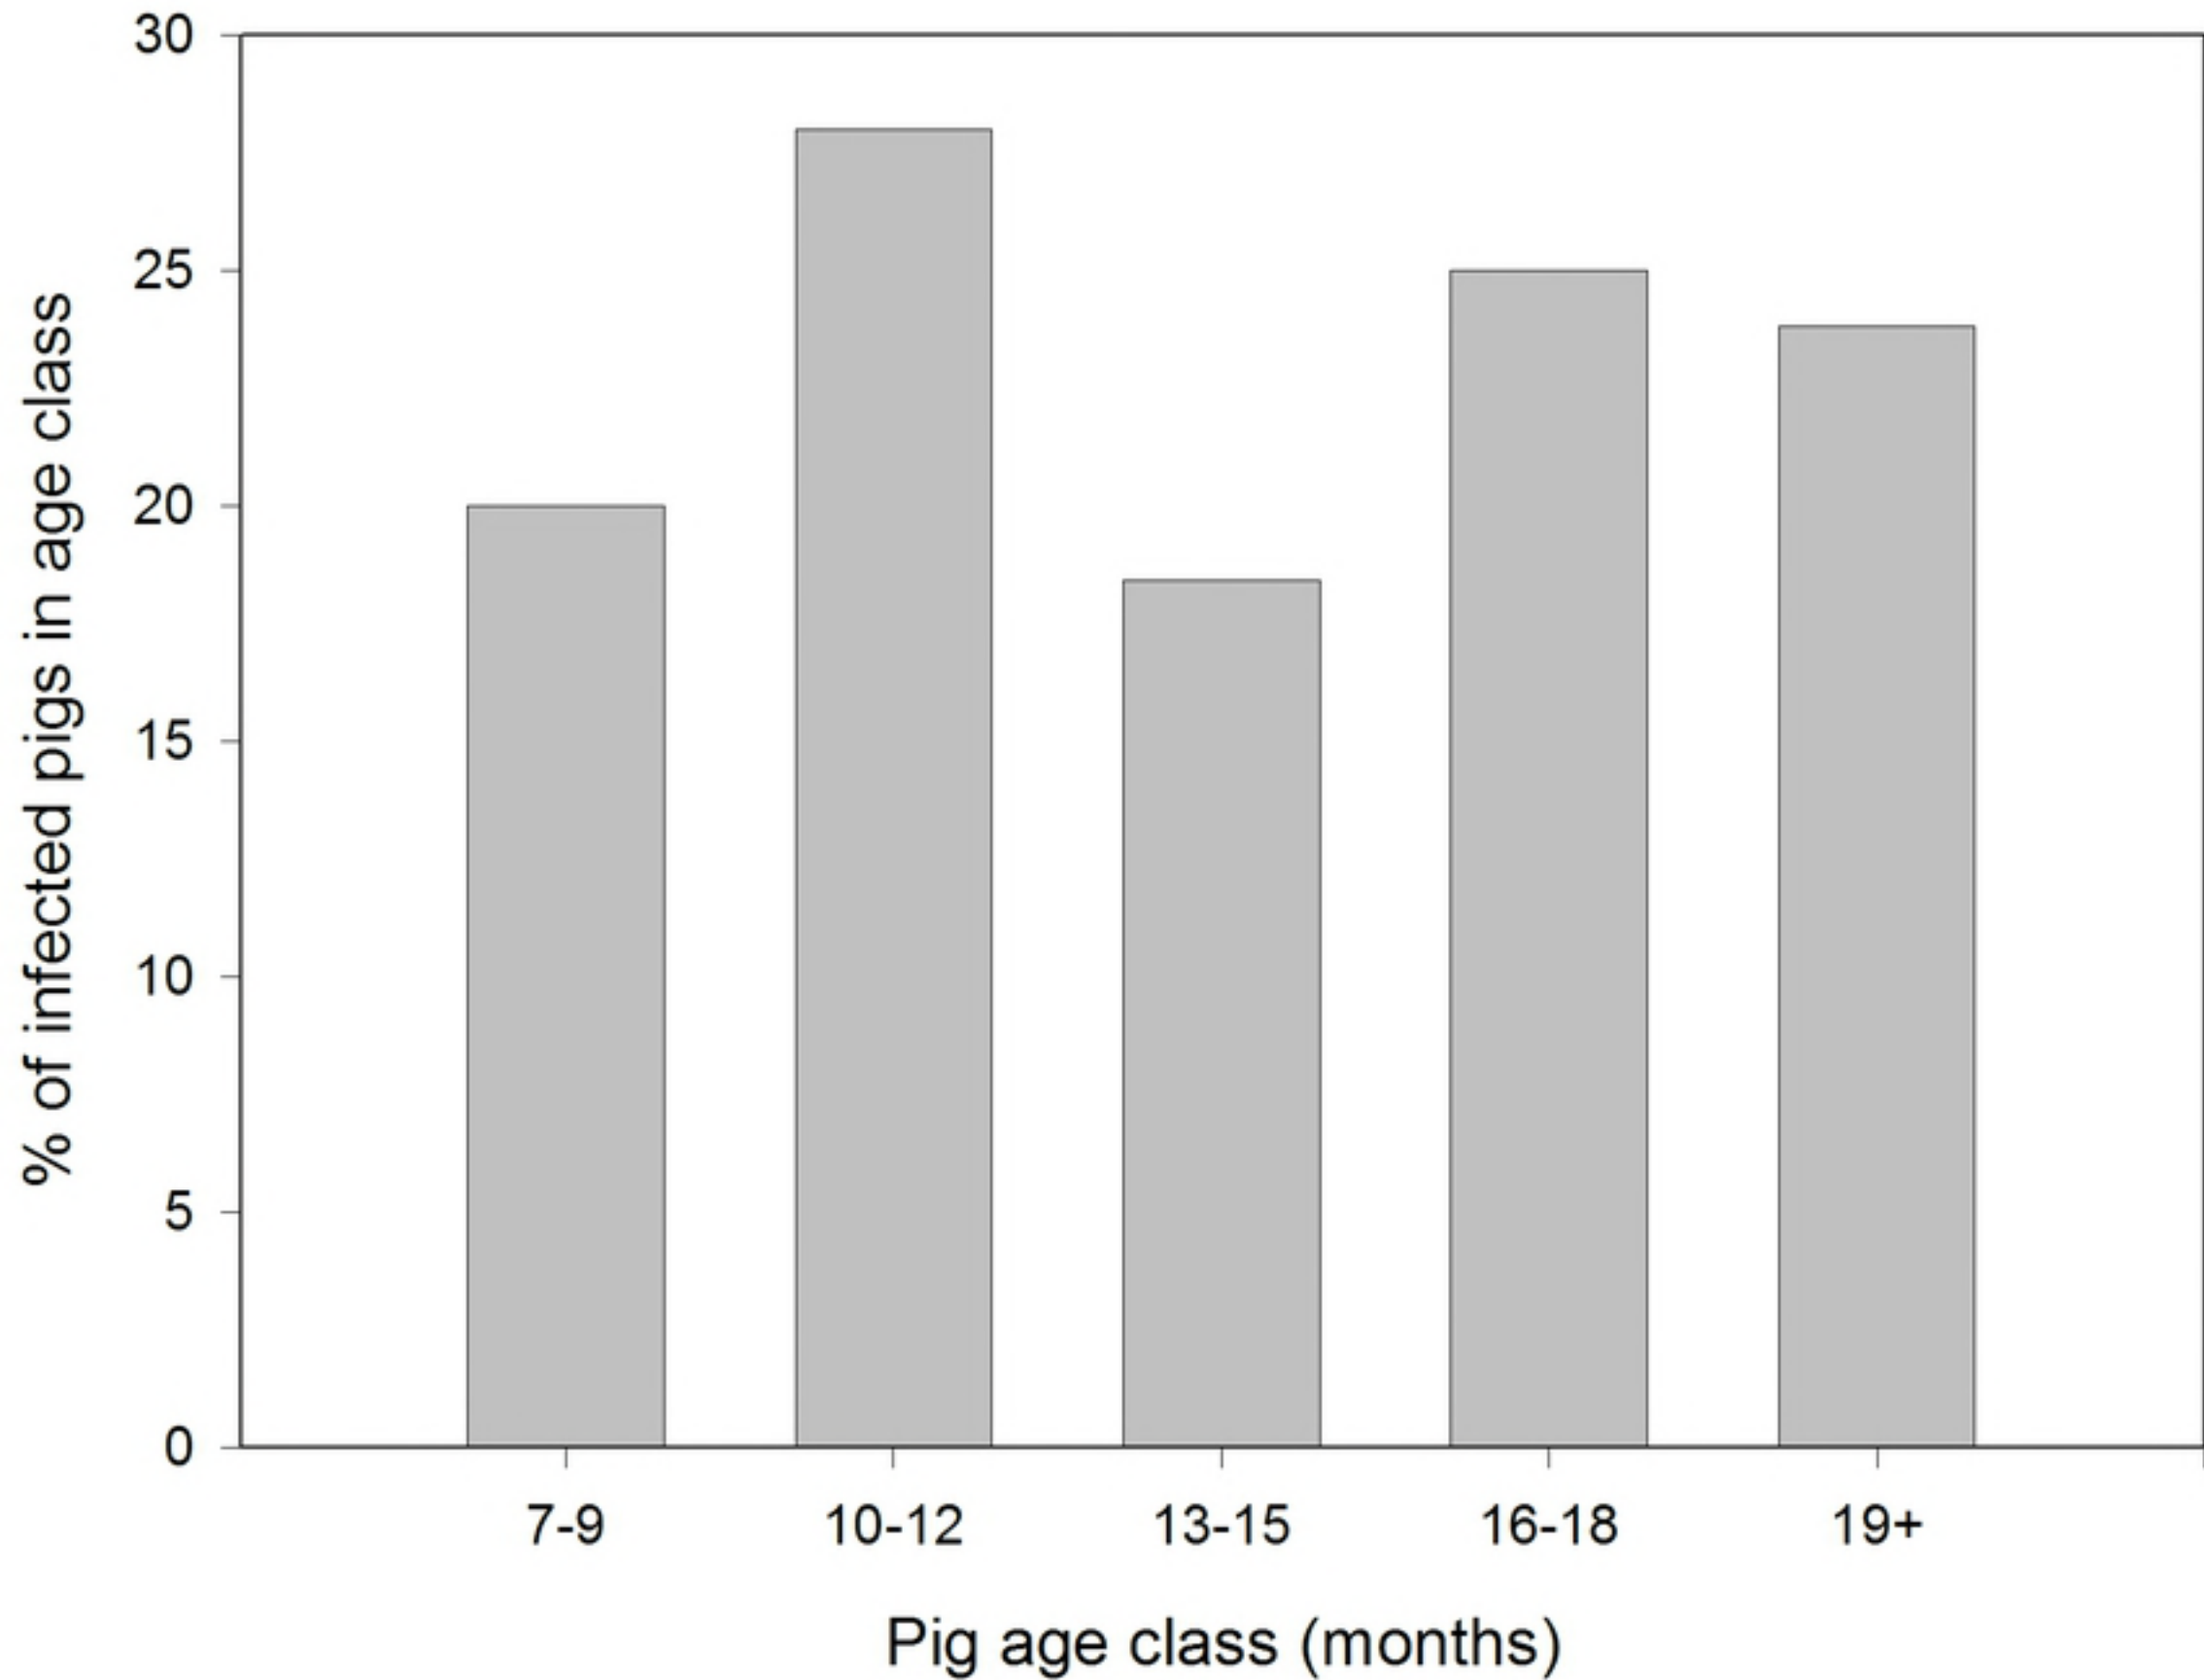

Source: http://biorxiv.org/content/10.1101/416370v1.full.pdf
